# Supplementary material
Source: publisher figshare collection journal article supplement (https://tandf.figshare.com/ndownloader/files/9658333)
Supplement: Supplementary file 1 [file 9658333]

| Table 4: Educational Institutions | | |
| --- | --- | --- |
| Country | **University** | **Wheelchair and seating module** |
| Bangladesh  Ghana  Haiti | Bangladesh Health Profession Institute (BHPI) (2017 email from University to author; unreferenced, see “notes”)  Br. Tarcisius Prosthetics & Orthotics Training College (2017 email from University to author; unreferenced, see “notes”)    Episcopaluniversity of Haiti (information received through social media; unreferenced, see “notes”) | BA Physiotherapy, subject: Prosthetics & Orthotics­:, course contents includes wheelchair prescribing procedure, core knowledge and service steps relating to wheelchairs and special seating and the role of Physiotherapist in wheelchair provision. BA OT; 2nd year term 1: mobility aids and special seating. BA OT 4th year, term Special seating and wheelchairs, includes lectures, self directed learning and practical classes. Individual training also provided to students using the Wheelchair Service Delivery Training, Basic Level, total hours: 32. Affiliated with Centre for the Rehabilitation of the Paralysed (CRP). Clinical placements in their special seating production workshop and clinic, here 2nd year OT/PT do observation placement, 4th year students do short clinical placements, internships also provided.  Annual one week wheelchair training. On completion an International Red Cross certificate provided.  In January 2017 They provided a two day continuing education course: Wheelchair Seating and 24 hour Postural Care: Physical Assessment, Goals and Interventions, January 26 & 27, 2017. The people who attended were: FSRL second year PT students, Rehab techs and OT working in the community, Director and staff of St Vincent’s school two OT’s from the USA with training and experience in wheelchair and seating provided a two day continuing education course covering wheelchair seating and 24hr postural care, physical assessment, goals and interventions. This was provided to 2nd yr PT students, Rehab Tech’s, community OT’s and staff/director of St. Vincent’s school. They provided a two day continuing education course: Wheelchair Seating and 24 hour Postural Care: Physical Assessment, Goals and Interventions, January 26 & 27, 2017. The people who attended were: FSRL second year PT students, Rehab techs and OT working in the community, Director and staff of St Vincent’s school |
| India  Tanzania  Zimbabwe  Afghanistan  India | The Annamalai University (Post Graduate Degree in Physical Medicine and Rehabilitation) [147]  S.R.M Institute of Science and Technology (Masters of Occupational Therapy (M.O.T) course [148]  Pandit Deendal Upadhayaya Institute for the Physically Handicapped (BA in prosthetics and Orthotics) [149]  Bihar College of Physiotherapy and Occupational Therapy (Final Bachelor of Occupational Therapy) [150]  Tanzania Training Center for Orthopaedic Technologists (TATCOT) [151]  University of Zimbabwe (2017 email from University to author; unreferenced, see “notes”)  Physiotherapy Training Institute [152]  College of Occupational Therapy Delhi Institute of Rural Development [153]  Department of Rehabilitation sciences, Jamia Hamdord [154]  Ahmedabad Institute of Medical Sciences [155]  Smt. Kamlaben P. Patel Institute of Physiotherapy and Occupational Therapy [156]  Manipal College of Allied Health Sciences [157]  Government Medical College and Hospital Nagpur [158]  Lockmanya Tilak Memorial Medical College and Hospitals [159]  All India Institute of Physical Medicine and Rehabilitation [160]  Patil College of Occupational Therapy [161]  Swami Vivekanand National Institute of Rehabilitation Training and Research (SVNIRTAR) [162]  KMCH College of Occupational Therapy [163]  Jaipur Occupational Therapy College [164] | Included in Functional Independence module; it incorporates medical and rehabilitative aspects of Wheelchairs, wheelchair adaptations, selection, seating, modifications,  Prescription, training.  Syllabus for the masters of M.O.T  Module - Advanced O.T In Orthopaedics: Subject : Wheelchairs (prescription, adaptations, training, and advanced transfers)  The Institute provides wheelchairs under the scheme of Assistance to Disabled Persons for Purchase and Fitting of Aids and Appliances (ADIP) scheme of the Indian government. This is facilitated via the Prosthetic and Orthotics course.  Final Bachelor of Occupational Therapy (B.TH.O) syllabus includes unit in Bioengineering and Ergonomics incorporating Wheelchair module encompassing wheelchair types, components, specifications, materials and their properties, modifications, wheelchair operating check, wheelchair adapted equipment (cushions, adjustments)  Certificate in wheelchair technology  BSc Honours in Occupational Therapy; wheelchair module (Wheelchair Management Course: OT Techniques (ii) is taught in 2nd year. Course content includes theory and practical classes. Course outline: Introduction and overview of UNCRPD article 20, posture, contextual factors, pressure sores, secondary supports, transfers, wheelchair service steps, practical at Jairos Jiri or Rescue.  No information available online or provided from universities following contact by researcher via email and/or social media. |
| Indonesia | Surakarta Health Polytechnic Diploma [165] |  |
| Kenya | Kenya Medical Training Centre Nairobi [166] |  |
| Nigeria  Pakistan | Federal School of Occupational Therapy [167]  Dow University of Health Sciences [168] |  |
| Philippines  Rwanda | Cebu Doctors University (Bachelor of Science Degree in Occupational Therapy) [169]  University of Rwanda College of Medicine and Health Sciences [170] |  |
| Sri Lanka | School of Physiotherapy and Occupational Therapy [171] |  |
| Tanzania | Tumaini University Diploma [172] |  |
| Uganda  Zambia | Occupational Therapy Training School Mulago Kampala [173]  Lusaka Apex medical University [174] |  |
| Malawi  Mala Rep. Of Korea  Madagascar | University of Malawi, College of Medicine ((2017 email from University to author; unreferenced, see “notes”)  nine universities of health sciences in Korea [175]  University of Antananarivo [176] | Correspondence received from University- No training in wheelchair provision provided  University website in other language and therefore excluded |
